# Supplementary material for: The landscape of mechanical properties of molecular crystals
Source: Royal Society of Chemistry journal article supplement (doi:10.1039/c9ce01874c), 2020-01-01
Supplement: c9ce01874c1.xlsx [file c9ce01874c1.xlsx]

## Sheet: E and H
	E (GPa)	SD(E)	H (GPa)	SD (H)	Maximum Displacement (nm)	Peak load (mN)	Title of Ref.
van:cda	6.2	0.8	0.14	0.02	500		Correlation Among Crystal Structure, Mechanical Behavior, and Tabletability in the Co-Crystals of Vanillin Isomers
evan:cda	6.5	0.3	0.21	0.01
ivan:cda	5.5	0.8	0.17	0.01
sb-ovan:cda	4.3	0.2	0.15	0.01
β-piroxicam	13.09	0.22	0.53	0.2	500		Origin of deteriorated crystal plasticity and compaction properties of a 1: 1 cocrystal between piroxicam and saccharin
saccharin	8.93	0.13	0.49	0.01
β-piroxicam-saccharin cocrystal	20.31	1.19	0.63	0.04
Theophylline anhydrate	11.59	0.27	0.28	0.01	1000		Understanding the relationship between crystal structure, plasticity and compaction behaviour of theophylline, methyl gallate, and their 1: 1 co-crystal
Methyl gallate	9.38	0.67	0.78	0.14
Theophyline-methyl gallate Co-crystal	15.09	0.92	0.48	0.05
ACM Form 1	16.58	0.29	0.875	0.029	500
ACM HCl	3.59	0.39	0.42	0.04			Ionized form of acetaminophen with improved compaction properties
DPH-Ace	8.96	0.59	0.3	0.04	1000		Relationships among crystal structures, mechanical properties, and tableting performance probed using four salts of diphenhydramine
DPH-Cit	9.54	0.87	0.48	0.03
DPH-HCl	11.91	3.03	0.86	0.29
DPH-Sac	10.8	2.6	0.88	0.12
Metformin HCl	20.4	0.97	0.92	0.06	1000		Expedited development of a high dose orally disintegrating metformin tablet enabled by sweet salt formation with acesulfame
Metformin Acs	9.36	0.6	0.52	0.05
ACM Form 1	14.874	1.124	0.875	0.029	500		Ionized form of acetaminophen with improved compaction properties
α-lactose monohydrate	21.44	0.96	0.869	0.06	1500–2000		Influence of mechanical properties on impact fracture: Prediction of the milling behaviour of pharmaceutical powders by nanoindentation
Acetylsalicylic acid	5.44	0.45	0.222	0.002	1300–2000
Citric acid monohydrate	16.38	1.36	0.608	0.007	3000–4000
Compound A	9.93	0.97	0.248	0.013	4000–5000
Ascorbic acid	34.46	1.75	1.003	0.056	1000–2000
Sucrose	23.97	1.51	1.013	0.127	2000–3000
Tartaric acid	43.34	0.65	1.354	0.047	2000–2500
Glycine	23.56	1.08	0.852	0.035	1300–2200
Calcium fumarate trihydrate 100	33.3	0.6	1.32	0.06	1000		Mechanical Properties of a Calcium Dietary Supplement, Calcium Fumarate Trihydrate
Calcium fumarate trihydrate 010	16.7	0.3	1.36	0.04
Calcium fumarate trihydrate 001	24.9	0.6	1.05	0.04
Aspirin Form1 100	5.97	0.291	0.257	0.007		6	Interaction anisotropy and shear instability of aspirin polymorphs established by nanoindentation
Aspirin Form1 001	9.57	0.201	0.24	0.008
Aspirin Form2 102	4.96	0.226	0.152	0.004
Caffeine 4-chloro-3-nitrobenzoic acid Form I 001	7.86	0.028	0.175	0.05		6	The Role of Weak Interactions in the Phase Transition and Distinct Mechanical Behavior of Two Structurally Similar Caffeine Co-crystal Polymorphs Studied by Nanoindentation
Caffeine 4-chloro-3-nitrobenzoic acid Form I 111
Caffeine 4-chloro-3-nitrobenzoic acid Form 2 011	6.715	0.009	0.106	0.003
Caffeine 4-chloro-3-nitrobenzoic acid Form 2 011	4.92	0.005	0.096	0.003
Piroxicam I -100	11.9	2.8	0.56	0.18	700		Nanomechanical Properties of Selected Single Pharmaceutical Crystals as a Predictor of Their Bulk Behaviour
Piroxicam I 011	12.8	0.04	0.67	0.04
Piroxicam I 01-1	14.6	0.3	0.42	0.02
Famotidine A -100	22.6	2	1.58	0.4
Famotidine A 00-1	20.1	1.2	1.33	0.16
Famotidine B	19.5	0.4	0.84	0.16
Nifedipine α	13.8	6.9	0.71	0.61
Olanzapine I 100	14.8	0.4	0.74	0.04
Olanzapine I 0-1-1	13.2	0.3	0.72	0.02
Succinic acid	14.01	0.75	0.459	0.052		6	Odd−Even Effect in the Elastic Modulii of α,ω-Alkanedicarboxylic Acids; Hardness Alternation in a,w-Alkanedicarboxylic Acids
Glutaric acid	7.28	0.9	0.1351	0.079
adipic acid	11.53	0.49	0.313	0.085
pimelic acid	8.23	0.85	0.2645	0.071
suberic acid	9.64	0.39	0.2949	0.051
azelaic acid	8.28	0.38	0.25889	0.038
Malonic acid	9.13	0.61
Felodipine Form1 100	12.81	0.19	0.553	0.016		6	Studying Microstructure in Molecular Crystals With Nanoindentation: Intergrowth Polymorphism in Felodipine
Felodipine Form1 001	6.24	0.18	0.258	0.007
Felodipine Form1 100	6.19	0.25	0.26	0.01
Felodipine Form1 100	4.29	0.13	0.208	0.008
Felodipine Form3 10-1	10.47	0.19	0.451	0.013
2-((R)-2-methylpyrrolidin-2-yl)-1H-benzimidazole-4-carboxamide crystalline form 1	10.4		0.43			0.2-9	Evaluation of Effects of Pharmaceutical Processing on Structural Disorders of Active Pharmaceutical Ingredient Crystals Using Nanoindentation and High-Resolution Total Scattering Pair Distribution Function Analysis
sphingosine-1-phosphate receptor agonists	2.7		0.15
Sucrose 001	38.2	0.4	1.57	0.07		1	Mechanical behavior assessment of sucrose using nanoindentation
Sucrose 100	33	1.1	1.44	0.07
VOR 100	3.79	0.17	0.3669	0.0028		5	Tuning Mechanical Properties of Pharmaceutical Crystals with Multicomponent Crystals: Voriconazole as a Case Study
VOR HCl 1-2	19.41	0.13	0.87	0.006
VOR OXA1	5.95	0.1	0.4261	0.0058
VOR OXA2	8.29	0.25	0.6284	0.002
VOR Fum	5.79	0.26	0.2927	0.0034
VOR PAB	5.63	0.35	0.2645	0.005
VOR PHB	5.64	0.21	0.2628	0.0016
Omeprazole	12.02	0.35	0.432	0.002		4	Solid Solution Hardening of Molecular Crystals: Tautomeric Polymorphs of Omeprazole
Omeprazole	12.14	0.37	0.596	0.002
Omeprazole	12.2	0.2	0.68	0.001
Omeprazole	12.38	0.3	0.725	0.003
Omeprazole	13.32	0.41	0.855	0.003
saccharin	13.94	0.07	0.53	0.01		5	Temperature Dependence of Mechanical Properties in Molecular Crystals
Sulfathiazole	21.88	0.22	0.9	0.03
L-alanine	25.1	0.72	0.99	0.05
Curcumin 1	11.15	0.2	0.432	0.015		6	Solubility-Hardness Correlation in Molecular Crystals: Curcumin and Sulfathiazole Polymorphs
Curcumin 2	5.68	0.25	0.341	0.017
Curcumin 3	5.6	0.29	0.333	0.018
Sulfathiazole 1	10.01	0.19	0.356	0.01
Sulfathiazole 2	20.44	0.25	1.08	0.015
Sulfathiazole 3	16.42	0.3	0.704	0.018
Sulfathiazole 4	17.31	0.21	0.881	0.012
Febuxostat Q	2.743	0.16	0.214	0.009		1	Correlating single crystal structure, nano-mechanical and bulk compaction behavior of Febuxostat polymorphs
Febuxostat H1	4.51	0.631	0.31	0.028
Sildenafil citrate	13.9	1.5	0.52	0.06		40	Predictive Milling of Pharmaceutical Materials Using Nanoindentation of Single Crystals
voriconazole batch 1	3.7	0.4	0.13	0.01
A	2.9	0.4	0.1	0.02
B	7.6	0.5	0.39	0.05
C	14.9	1.3	0.43	0.07
voriconazole batch 2	3.5	0.3	0.17	0.02		40	Mechanical characterisation of powders using nanoindentation
voriconazole batch 3	4.5	0.2	0.13	0.02
voriconazole batch 4	4.3	1.1	0.14	0.02
L-alanine			1			4	On the loading rate sensitivity of plastic deformation in molecular crystals
saccharin			0.45
p-nitroaniline			0.33
sulfathiazole			0.65
1,2,4,5-tetracya-nobenzene with pyrene 100	4.98	0.249	0.143	0.01		6	Nanoindentation as a Probe for Mechanically-Induced Molecular Migration in Layered Organic Donor–Acceptor Complexes
1,2,4,5-tetracya-nobenzene with pyrene 002	3.92	0.054	0.12	0.001
1,2,4,5-tetracya-nobenzene with phenan-threne 020	5.76	0.115	0.14	0.001
1,2,4,5-tetracya-nobenzene with phenan-threne 010	4.59	0.081	0.146	0.001
sodium saccharin dihydrate 011	18.4	0.063	0.662	0.022		6	Effect of dehydration on the mechanical properties of sodium saccharin dihydrate probed with nanoindentation
sodium saccharin dihydrate 101	15.88	0.057	0.7162	0.028
sodium saccharin dihydrate 011 after 35h	21.2	1.06	0.815	0.081
sodium saccharin dihydrate 101 after 35h	16.35	0.921	0.822	0.045
caffeine–glutaric acid Form 1	8.51	0.56	0.12	0.01		80	Comparison of surface techniques for the discrimination of polymorphs
caffeine–glutaric acid Form 2	9.14	0.95	0.23	0.02
Saccharin 011	14.01	0.03	0.55	0.02		6	Mechanical Anisotropy in Crystalline Saccharin: Nanoindentation Studies
Saccharin 100	13.36	0.05	0.61	0.02
Saccharin 100	13.9	0.4	0.53	0.003		5	Anisotropy in the mechanical properties of organic crystals: temperature dependence
Saccharin 011	14	0.03	0.5013	0.0023
L-Alanine 001	25.1	0.28	1.14	0.0048
L-Alanine 101	19.2	0.54	0.943	0.0031
griseofulvin	12.42	0.711	0.4	0.04		5	Nanomechanical testing technique for millimeter-sized and smaller molecular crystals
griseofulvin	11.43	3.56
griseofulvin	11.53	2.62
griseofulvin	12.73	0.71	0.41	0.03
griseofulvin	12.5	0.72	0.41	0.03
α-glycine 010	26	1	1.45	0.15	800		Unusually large Young's moduli of amino acid molecular crystals; personal communication
α-glycine 110	29	2	1.5	0.2
α-glycine 011	33	1	1.06	0.05
α-glycine 001	44	1	0.98	0.02
γ-glycine 100	28	1	1.1	0.1
L-alanine 010	21.2	0.3	1.2	0.1
L-alanine 120	20.8	0.4	1.3	0.1
L-alanine 011	34.4	0.2	1.8	0.1
dl-serine 100	23.1	0.5	1.6	0.3
glycylglycine 001	26	2	1.1	0.1
cyclotrimethylene 210	21	0.6	0.672	0.035		3.3-3.5	Direct observation of plasticity and quantitative hardness measurements in single crystal cyclotrimethylene trinitramine by nanoindentation
cyclotrimethylene 021	18.2	0.6	0.681	0.033
cyclotrimethylene 001	16.2	1	0.615	0.035
Aspirin 0 0 1	2.96		0.1			30-120	The breakage behaviour of Aspirin under quasi-static indentation and single
Aspirin 1 0 0	5.105		0.115
Hexachlorobenzene	3.66		0.118			2	Spatially resolved analysis of short-range structure perturbations in a plastically bent molecular crystal
Hexachlorobenzene	4.82		0.245
Hexachlorobenzene	0.6		0.001
Hexachlorobenzene	5.3		0.084
Hexachlorobenzene	0.272		0.009
β-HMX face1	23.4		1.1			0.6	The Elastic Modulus of β-HMX Crystals Determined by Nanoindentation
β-HMX face2	26.1		0.95
LLM-105	20.5	1.5	0.73	0.1	2000		Deformation and fracture of LLM-105 molecular crystals studied by nanoindentation
β-HMX	17.6	1.2	0.65	0.09
Fluorinated Amide form1	8.36	0.477	0.347	0.024		6	Quantitative Investigation of the Structural, Thermal, and Mechanical Properties of Polymorphs of a Fluorinated Amide
Fluorinated Amide form2	6.17	0.243	0.172	0.006
1,1-Diamino-2,2-dinitroethylene 020	11.09	0.83	0.52	0.05		8	Mechanical Anisotropy of the Energetic Crystal of 1,1-Diamino-2,2-dinitroethylene (FOX-7): A Study by Nanoindentation Experiments and Density Functional Theory Calculations
1,1-Diamino-2,2-dinitroethylene -101	16.65	0.79	0.63	0.02
1,1-Diamino-2,2-dinitroethylene 002	21.34	1.01	0.67	0.03
1,2,4,5-Tetrabromobenzene	6.431		0.672			5	Kinematic and Mechanical Profile of the Self-Actuation of Thermosalient Crystal Twins of 1,2,4,5-Tetrabromobenzene
piroxicam 01¯1	17.16	0.4	0.82	0.03		3-100	Mechanical Anisotropy and Pressure Induced Structural Changes in Piroxicam Crystals Probed by In Situ Indentation and Raman Spectroscopy
piroxicam 011	16.1	0.9	0.64	0.05
Mn(2-methylsuccinate)]n 003	18.3	0.7	0.89	0.05		6	Magnetic and Mechanical Anisotropy in a Manganese 2-Methylsuccinate Framework Structure
Mn(2-methylsuccinate)]n-230	24.2	0.44	1.22	0.06
cyclotrimethylenetrinitramine	19.1	1.9	0.741	0.098		0.8	The Mechanical Properties of Minimally Processed RDX
Acesulfame acid	4.2	0.075	0.24	0.07	1000		Reduced Punch Sticking Propensity of Acesulfame by Salt Formation: Role of Crystal Mechanical Property and Surface Chemistry
Acesulfame K	14.9	0.6	0.86	0.03		13.5
Form 1a	4.3		0.39		1000		Flexibility in a Molecular Crystal Accomplished by Structural Modulation of Carbohydrate Epimers
Form 1b	4.57		0.29
Form 2	5.8		0.24
BF2AVB Green/Form I (011)	10.6	0.35	0.275	0.012		6	The Relationship of Solid-State Plasticity to Mechanochromic Luminescence in Difluoroboron Avobenzone Polymorphs
BF2AVB Green/Form I (001)	7.4	0.31	0.34	0.007
BF2AVB Green/Form I (-120)	13.2	0.16	0.41	0.011
BF2AVB Cyan/Form II (001)	5.6	0.46	0.206	0.013
Oxalic acid dihydrate	18.81	0.96	0.35	0.03	1000		Computational Techniques for Predicting Mechanical Properties of Organic Crystals: A Systematic Evaluation
Aspirin	7.2	0.6	0.32	0.01		1	The mechanical properties of as-grown noncubic organic molecular crystals assessed by nanoindentation
HMX	24.5	1.3	0.99	0.06
TATB	9.6	1.5	0.41	0.04
TNT/CL-20	14.2	1.2	0.63	0.13
FOX-7	19.6	4	0.86	0.08
ADAAF	6.7	1.3	0.23	0.09
RDX	19.1		0.74
N‑(3-Ethynylphenyl)-3-fluorobenzamide Form I (110)	10.66	0.69	0.33	0.09		6	Crystal Structure-Mechanical Property Correlations in N‑(3-Ethynylphenyl)-3-fluorobenzamide Polymorphs
N‑(3-Ethynylphenyl)-3-fluorobenzamide Form II (100)	4.91	0.14	0.3	0.02
N‑(3-Ethynylphenyl)-3-fluorobenzamide Form III (200)	12.89	0.16	0.35	0.01
CPII 1 (010)	8.09	0.2	0.33	0.09		6	Rationalizing Distinct Mechanical Properties of Three Polymorphs of a Drug Adduct by Nanoindentation and Energy Frameworks Analysis: Role of Slip Layer Topology and Weak Interactions
CPII 2 (100)	3.54	0.05	0.13	0.02
CPII 3 (001)	11.5	1.2	0.38	0.05
EC2	12.76	0.82	0.226	0.012		5	Elastic flexibility tuning via interaction factor modulation in molecular crystals
EC3	8.43	0.31	0.291	0.03
EC4	12.54	0.33	0.367	0.025
SPR (200) Sulfapyridine	15.69	0.726	0.956	0.051		6	Molecular Basis for the Mechanical Response of Sulfa Drug Crystals
SCP (011) Sulfachloropyridazine	15.5	1.1	0.55	0.03
SDZ (100) Sulfadiazine	7.69	0.5	0.395	0.04
SMR (002) Sulfamerazine	9.54	0.86	0.313	0.05
STR (020) Sulfameter	5.71	0.18	0.355	0.02
SDX (002) Sulfadoxine	14.74	0.168	0.544	0.018
SMX (200) Sulfamethoxazole	13.74	0.498	0.489	0.034
STZ (100) Sulfathiazole	20.44	0.25	1.08	0.015
Celecoxib form III	16.27	0.43	0.45	0.02		5	Exceptionally Elastic Single-Component Pharmaceutical Crystals
INZ cocrystal 1	23.265		0.88			2	Single crystal plasticity defies bulk-phase mechanics in Isoniazid cocrystals with analogous coformers
INZ cocrystal 2	8.162		0.525
INZ cocrystal 3	5.782		0.4617
INZ cocrystal 4	6.967		0.248
INZ cocrystal 5	8.342		0.6382
INZ cocrystal 6	4.023		0.173
INZ cocrystal 7	9.885		0.6809
Substituted dihydropyrimidinone 1-F1	2.62	0.27	0.083	0.03		6	Guest Solvent‐dependence of the Nanomechanical Response in Substituted Dihydropyrimidinone Crystals 10.1002/asia.201801842
Substituted dihydropyrimidinone 1-F2	1.3	0.15	0.092	0.08
Substituted dihydropyrimidinone 2-F1	14.94	0.55	0.421	0.03
Substituted dihydropyrimidinone 2-F2	7.14	0.42	0.247	0.02
1 ME (001)	1.82	0.1	0.223	0.007		5	Remarkably Distinct Mechanical Flexibility in Three Structurally Similar Semiconducting Organic Crystals Studied by Nanoindentation and Molecular Dynamics DOI: 10.1021/acs.chemmater.8b04800
1 Et	16.1	0.44	0.502	0.038
1 nPr (001)	8.49	0.09	0.399	0.007
1 nPr (010)	10.18	0.24	0.427	0.022
In house database	13.01	0.292029	0.35	0.0107546
	44.575	5.14	1.459	0.07
	24.515	0.37	0.774	0.015
	7.54	0.63	0.376	0.06
	5.832	0.108	0.33	0.02
	5.667	0.449	0.276	0.046
	5.70875	0.486	0.1875	0.015
	8.8	2.0851	0.428	0.1372
	9.43	0.47	0.37	0.027
	6.939	0.379	0.337	0.0328
	46.797	4.826	1.694	0.147
	8.274	0.38	0.36	0.021
	14.27	0.55	0.638	0.015
	4.135	0.167	0.141	0.015
	3.14	0.767	0.166	0.04
	9.371	0.639	0.466	0.067
	7.118	0.334	0.361	0.035
	6.939	0.375	0.337	0.033
	8.324	0.516	0.403	0.045
	8.861	0.413	0.383	0.022
	10.334	0.661	0.431	0.043
	7.663	0.523	0.36	0.006
	7.932	0.655	0.154	0.009
	6.819	0.342	0.4	0.037
	6.511	0.233	0.471	0.033
	7.004	0.2	0.427	0.019
	11.038	0.582	0.421	0.03
	13.016	0.819	0.363	0.025
	11.67	1.44	0.68	0.01
	13.28	0.38	0.72	0.07
	29.128	1.183	1.229	0.106
	13.8	1.3	0.412	0.07
	5.66	0.12	0.26	0.008
	5.43	0.07	0.25	0.004
	9.82	0.13	0.51	0.013
	13.84	0.43	0.56	0.014
	3.6	0.28	0.12	0.037
	13.36	1.342	0.518	0.05
	4.71	0.22	0.353	0.017
	5.6	0.31	0.287	0.02
	6.2	0.16	0.378	0.018
	7.95	0.34	0.557	0.0187
	9.27	0.25	0.603	0.042
	10.55	0.375	0.428	0.021
	10.94	0.45	0.328	0.026
	13.85	0.32	0.6	0.021
	8.17	0.26	0.4	0.03
	18.36	1.36	1.12	0.1
	20.89	0.88	1.43	0.11
	6.33	0.34	0.29	0.09
	6.5	0.29	0.24	0.03
	5.39	0.77	0.18	0.04
	13.27	0.463	0.249	0.008
